# Supplementary material for: Development of a TaqMan-based multiplex real-time PCR for simultaneous detection of porcine epidemic diarrhea virus, Brachyspira hyodysenteriae, and Lawsonia intracellularis
Source: Front Vet Sci. 2024 Aug 14;11:1450066. doi: 10.3389/fvets.2024.1450066 (PMC11349621; doi:10.3389/fvets.2024.1450066)
Supplement: Supplementary file 1 [file Table_1.XLSX]

## Sheet: Sheet1
TABLE S1 The Sensitivity tests of multiplex real-time qPCR.
Templates	Concentrations (copies/µL)	The number of tested samples	Positive Number	Positive Rate (%)	95% confidence region
PEDV	1×102	30	30	100	√
	1×101	30	28	93.3	×
	1×100	30	0	0	×
	Negative control	30	0	0	×
B. hyodysenteriae	1×102	30	30	100	√
	1×101	30	30	100	√
	1×100	30	12	40	×
	Negative control	30	0	0	×
L. intracellularis	1×102	30	30	100	√
	1×101	30	30	100	√
	1×100	30	26	86.7	×
	Negative control	30	0	0	×
