# Supplementary material for: Development of a TaqMan-based multiplex real-time PCR for simultaneous detection of porcine epidemic diarrhea virus, Brachyspira hyodysenteriae, and Lawsonia intracellularis
Source: Front Vet Sci. 2024 Aug 14;11:1450066. doi: 10.3389/fvets.2024.1450066 (PMC11349621; doi:10.3389/fvets.2024.1450066)
Supplement: Supplementary file 2 [file Table_2.XLSX]

## Sheet: Sheet1
Table S2 The detection results of 30 diarrhea samples using the commercial singleplex real-time PCR detection kit and the mutiplex real-time PCR assay in this study
Sample	Multiplex Real-Time qPCR Assay			Commercial Singleplex RT-PCR Detection Kit
	PEDV	B. hyodysenteriae	L. intracellularis	PEDV	B. hyodysenteriae	L. intracellularis
1	-	-	+	-	-	+
2	-	-	+	-	-	+
3	-	+	+	-	+	+
4	+	+	+	+	+	+
5	-	-	+	-	-	+
6	+	-	+	+	-	+
7	+	+	+	+	+	+
8	-	+	+	-	+	+
9	+	-	+	+	-	+
10	+	-	+	+	-	+
11	-	+	+	-	+	+
12	-	+	+	-	+	+
13	-	+	+	-	+	+
14	-	+	+	-	+	+
15	-	+	+	-	+	+
16	-	+	+	-	+	+
17	+	+	+	+	+	+
18	+	-	+	+	-	+
19	+	+	+	+	+	+
20	-	+	+	-	+	+
21	-	+	+	-	+	+
22	-	+	+	-	+	+
23	+	+	+	+	+	+
24	-	-	+	-	-	+
25	-	+	+	-	+	+
26	+	+	+	+	+	+
27	-	+	+	-	+	+
28	-	-	+	-	-	+
29	+	-	+	+	-	+
30	+	-	+	+	-	+
